# Supplementary material for: Characterization of the human GnRH neuron developmental transcriptome using a GNRH1-TdTomato reporter line in human pluripotent stem cells
Source: PubMed Central journal article supplement (PMC7075073; doi:10.1242/dmm.040105), 2020-03-13
Supplement: dmm-13-040105-s1.pdf [file dmm-13-040105-s1.pdf]

## Supplementary Information

Figure S1

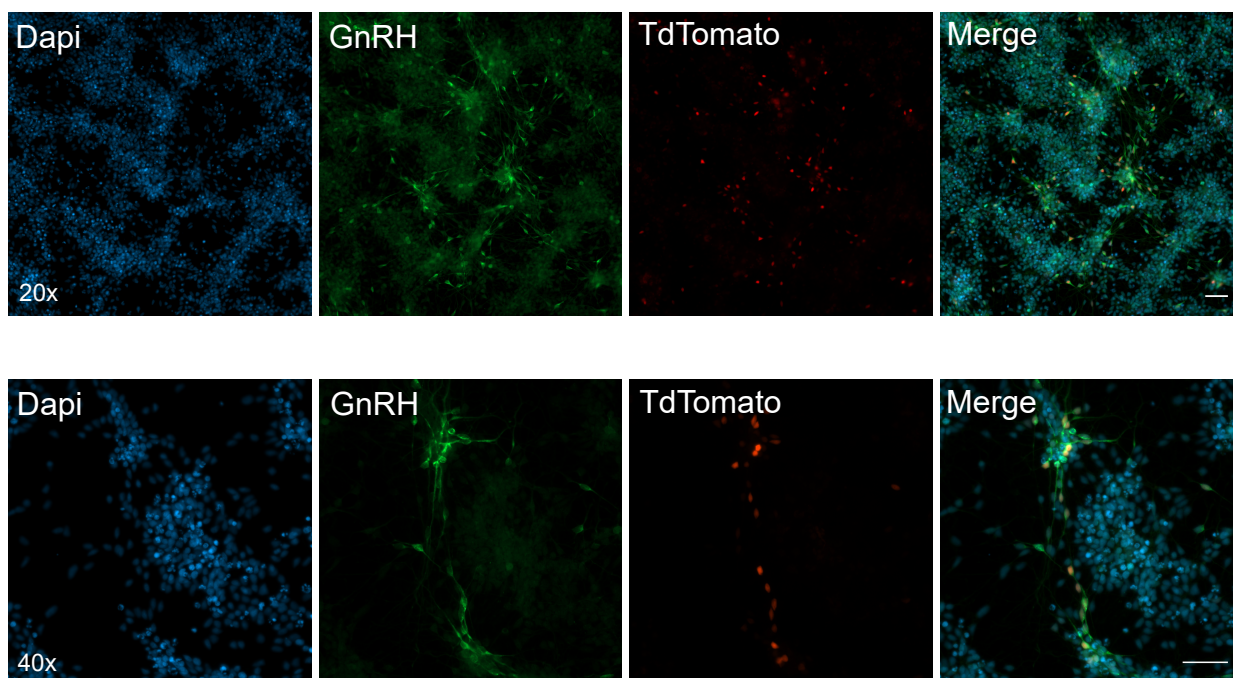

**Figure S1. Validation of the H9 hESC reporter clone by immunocytochemistry.**

The GnRH-TdTomato reporter generation was repeated in H9 hESCs. The successful clone "C11" was immunostained with anti-GnRH (Sheep) after differentiation to GnRH neurons. At day 25 of differentiation, anti-GnRH coincides with TdTomato. Scale bars indicate 50  $\mu$ m. Related to Figure 1A-D.

Figure S2

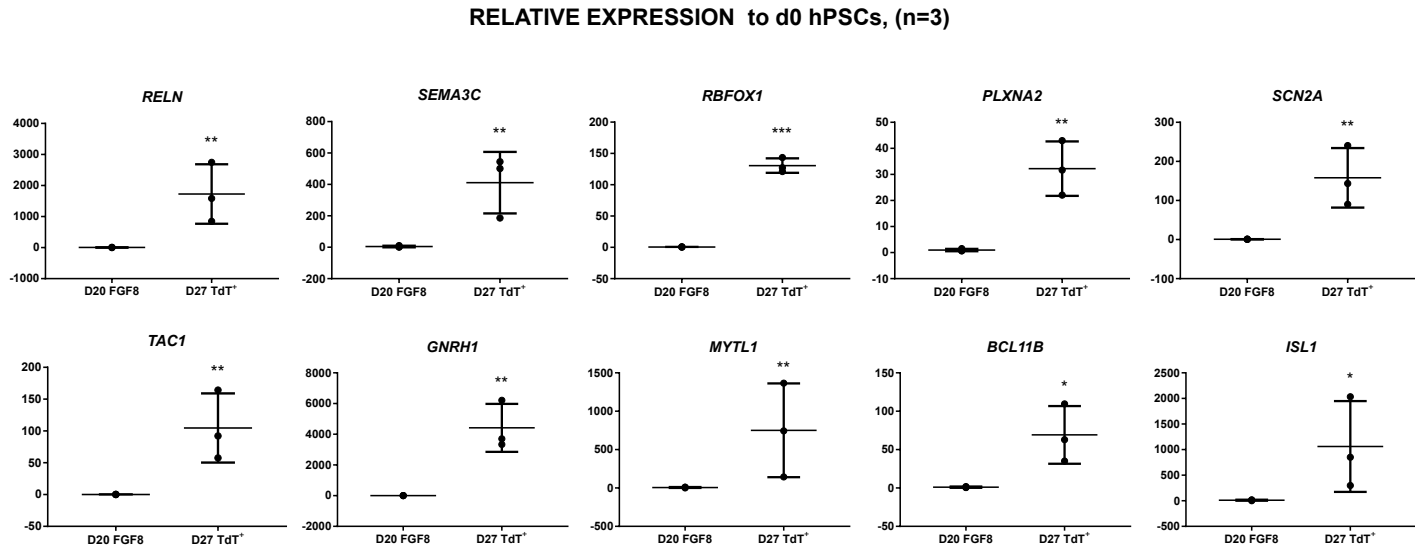

**Figure S2. Validation of the RNA sequencing results by qPCR.**

We performed qPCR of 10 genes that were within the top 50 most upregulated genes in Figure 2 C. Samples from D20 FGF8 neuronal progenitors, and D27 TdT+ neurons were collected from 3 independent experiments. *RELN*, *SEMA3C*, *RBFOX1*, *PLXNA2*, *SCN2A*, *TAC1*, and *GNRH1*, and transcription factors *MYTL1*, *BCL11B*, and *ISL1* exhibited increased relative expression in D27 TdT+ neurons, in accordance with the results in differential expression analysis 1. Statistical significance (ratio paired t-test) indicated as \* ( $P \leq 0.05$ ), \*\* ( $P \leq 0.01$ ), and \*\*\* ( $P \leq 0.001$ ). Related to Figure 2 C.

Figure S3

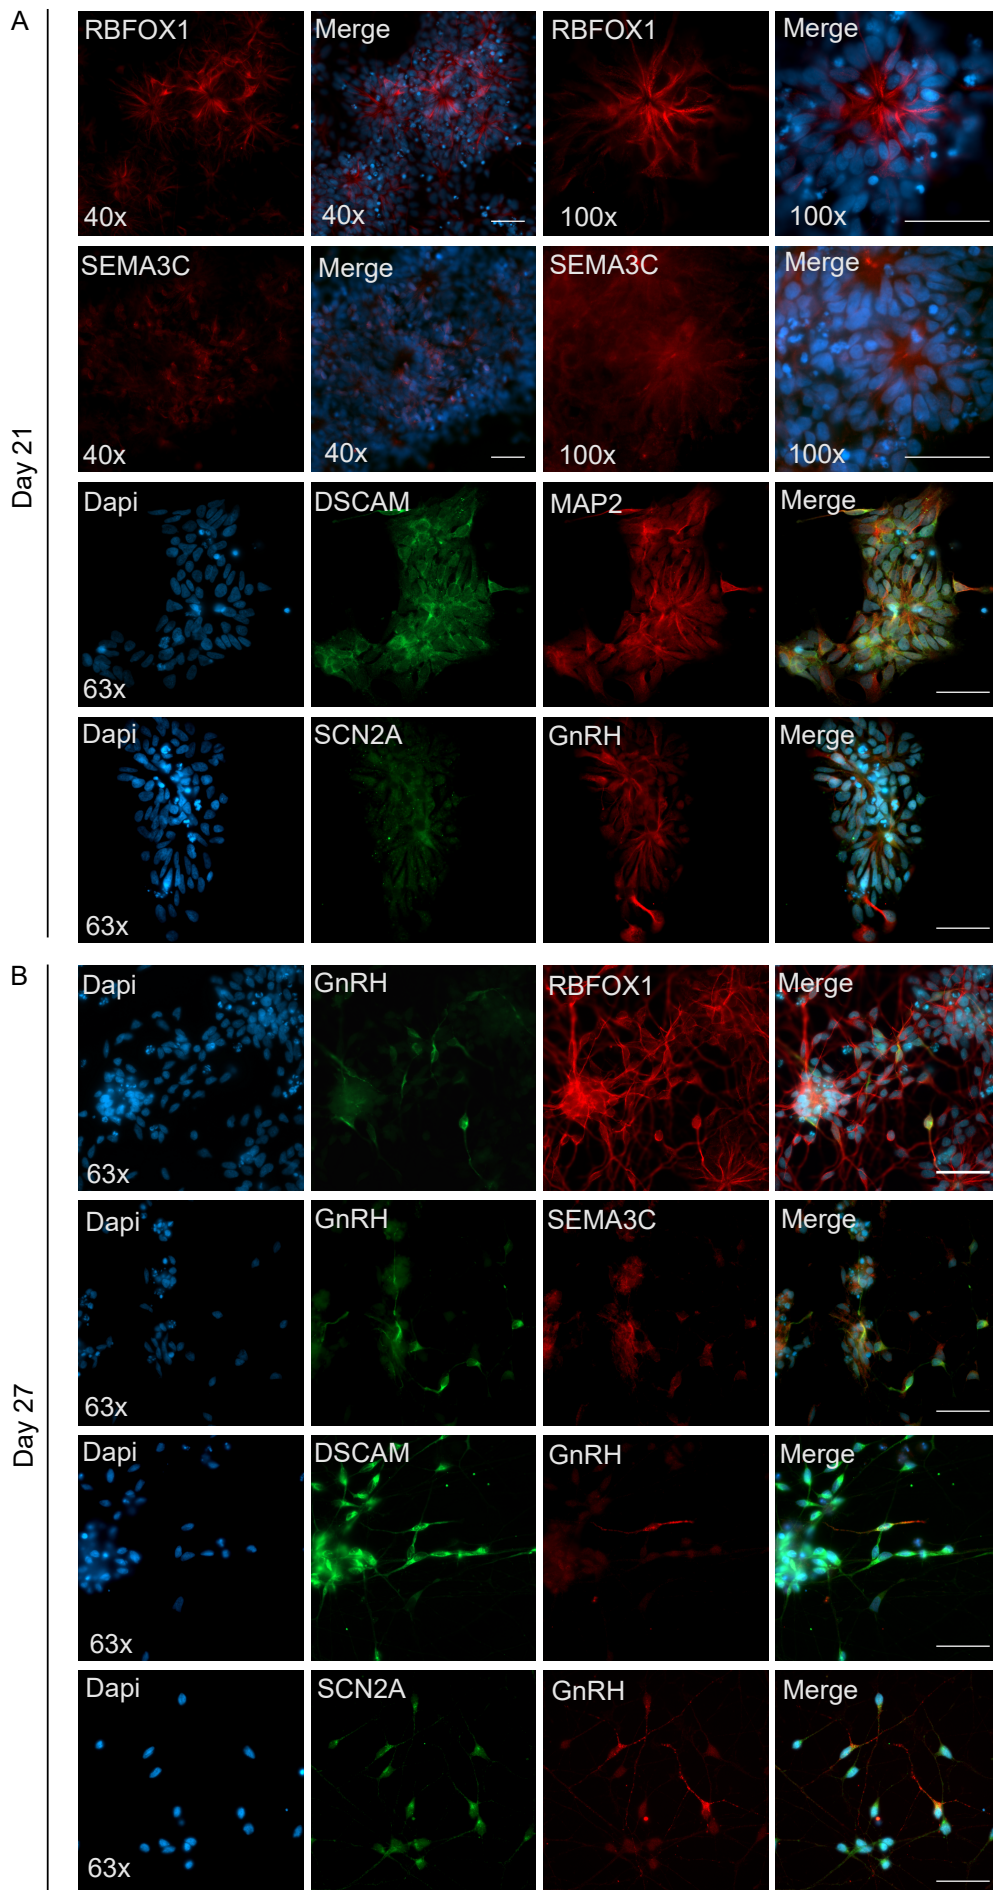

**Figure S3. Immunocytochemical validation of differentially expressed genes.**

Immunocytochemistry at D21 of anti-RBFOX1 and -SEMA3C with nuclear staining by Dapi using 40x and 100x objectives (A, two top rows). DSCAM and SCN2A were stained together with neuronal specific anti-MAP2 and imaged using 63x objective (A, bottom rows). At D27, differentiated neuronal cultures were stained together with anti-GnRH (B). These stainings showed more abundant signal for RBFOX1, SEMA3C, DSCAM and SCN2A. Scale bars indicate 50 μm.

Figure S4

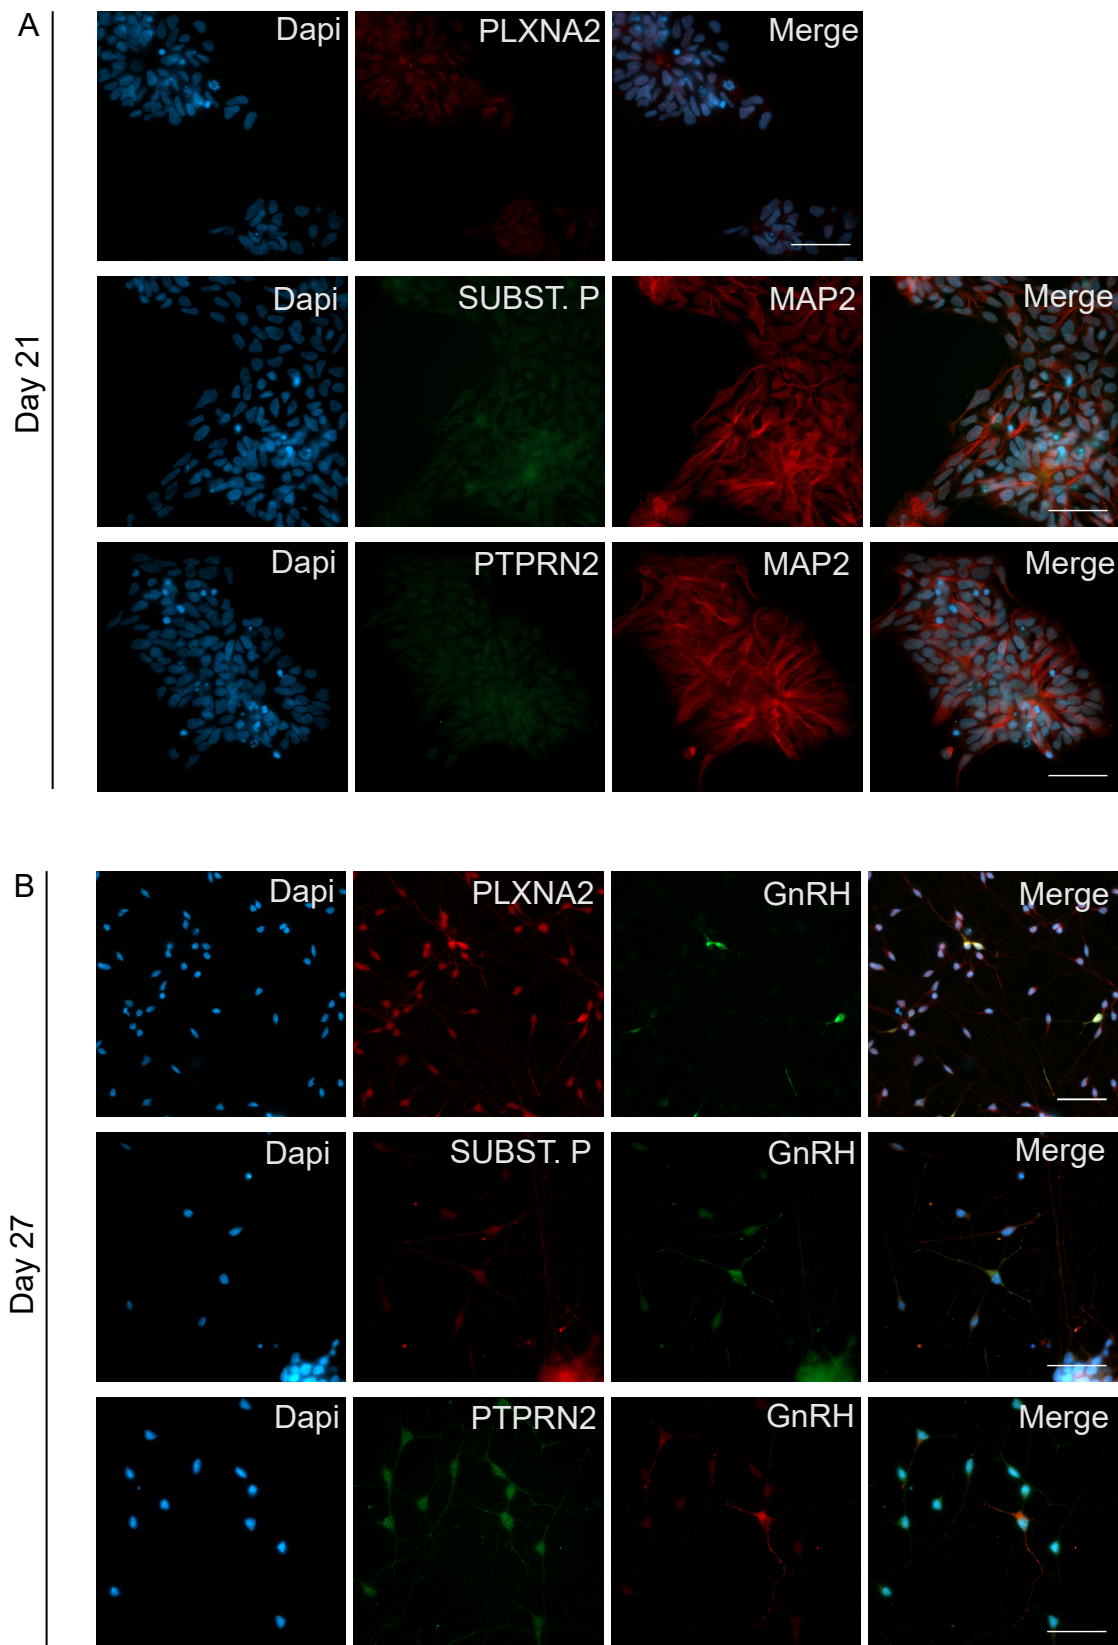

**Figure S4. Immunocytochemical validation of differentially expressed genes.**

Continuation of validation as described in Figure S3. Stainings were performed with antibodies for PLXNA2, Substance P (TAC1 isoform), and PTPRN2 (mature form). At day 21 Substance P and PTPRN2 were stained together with neuronal specific anti-MAP2 (A). At day 27 PLXNA2, Substance P, and PTPRN2 were stained together with anti-GnRH (B). Scale bars indicate 50  $\mu$ m.

Figure S5

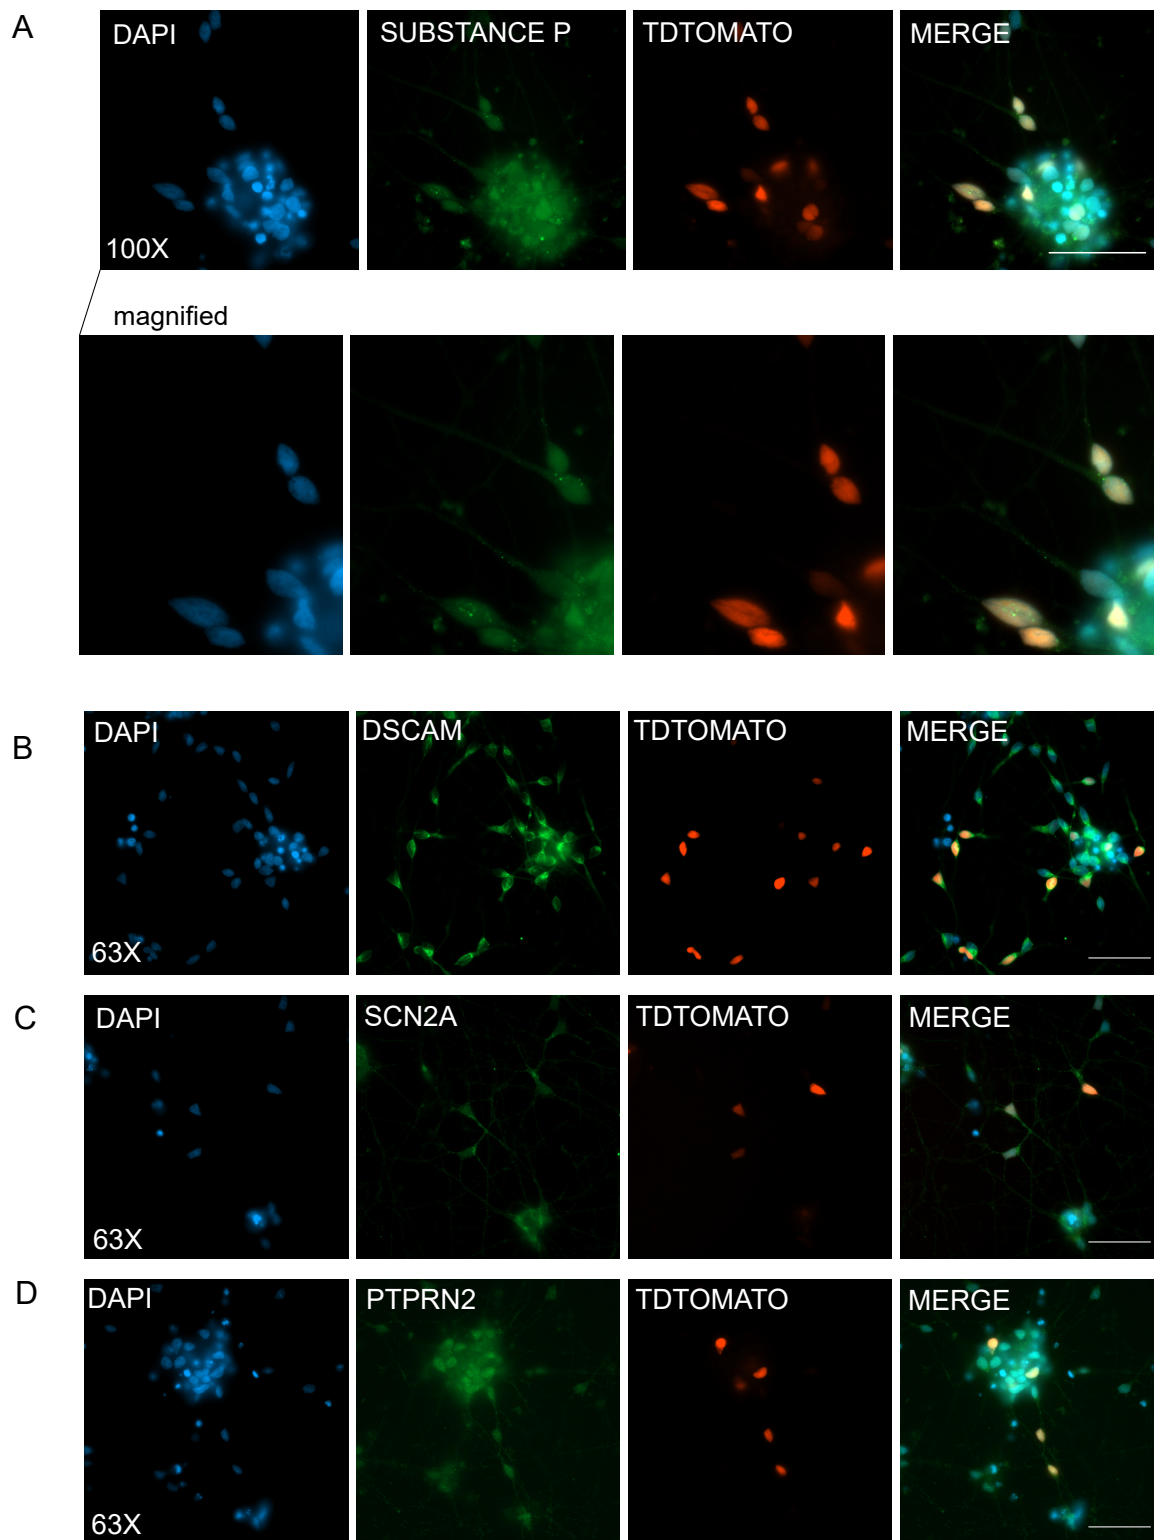

**Figure S5. Immunocytochemical validation of differentially expressed genes in the GnRH-TdTomato reporter cell line.**

For additional validation, we performed immunocytochemistry of Substance P (A), DSCAM (B) SCN2A (C), and PTPRN2 (D) also in the reporter cell line (TdTomato) at day 27. Stainings have been repeated at least once (N=2 (day 21) and N=3 (day 27)). Scale bars indicate 50  $\mu$ m.

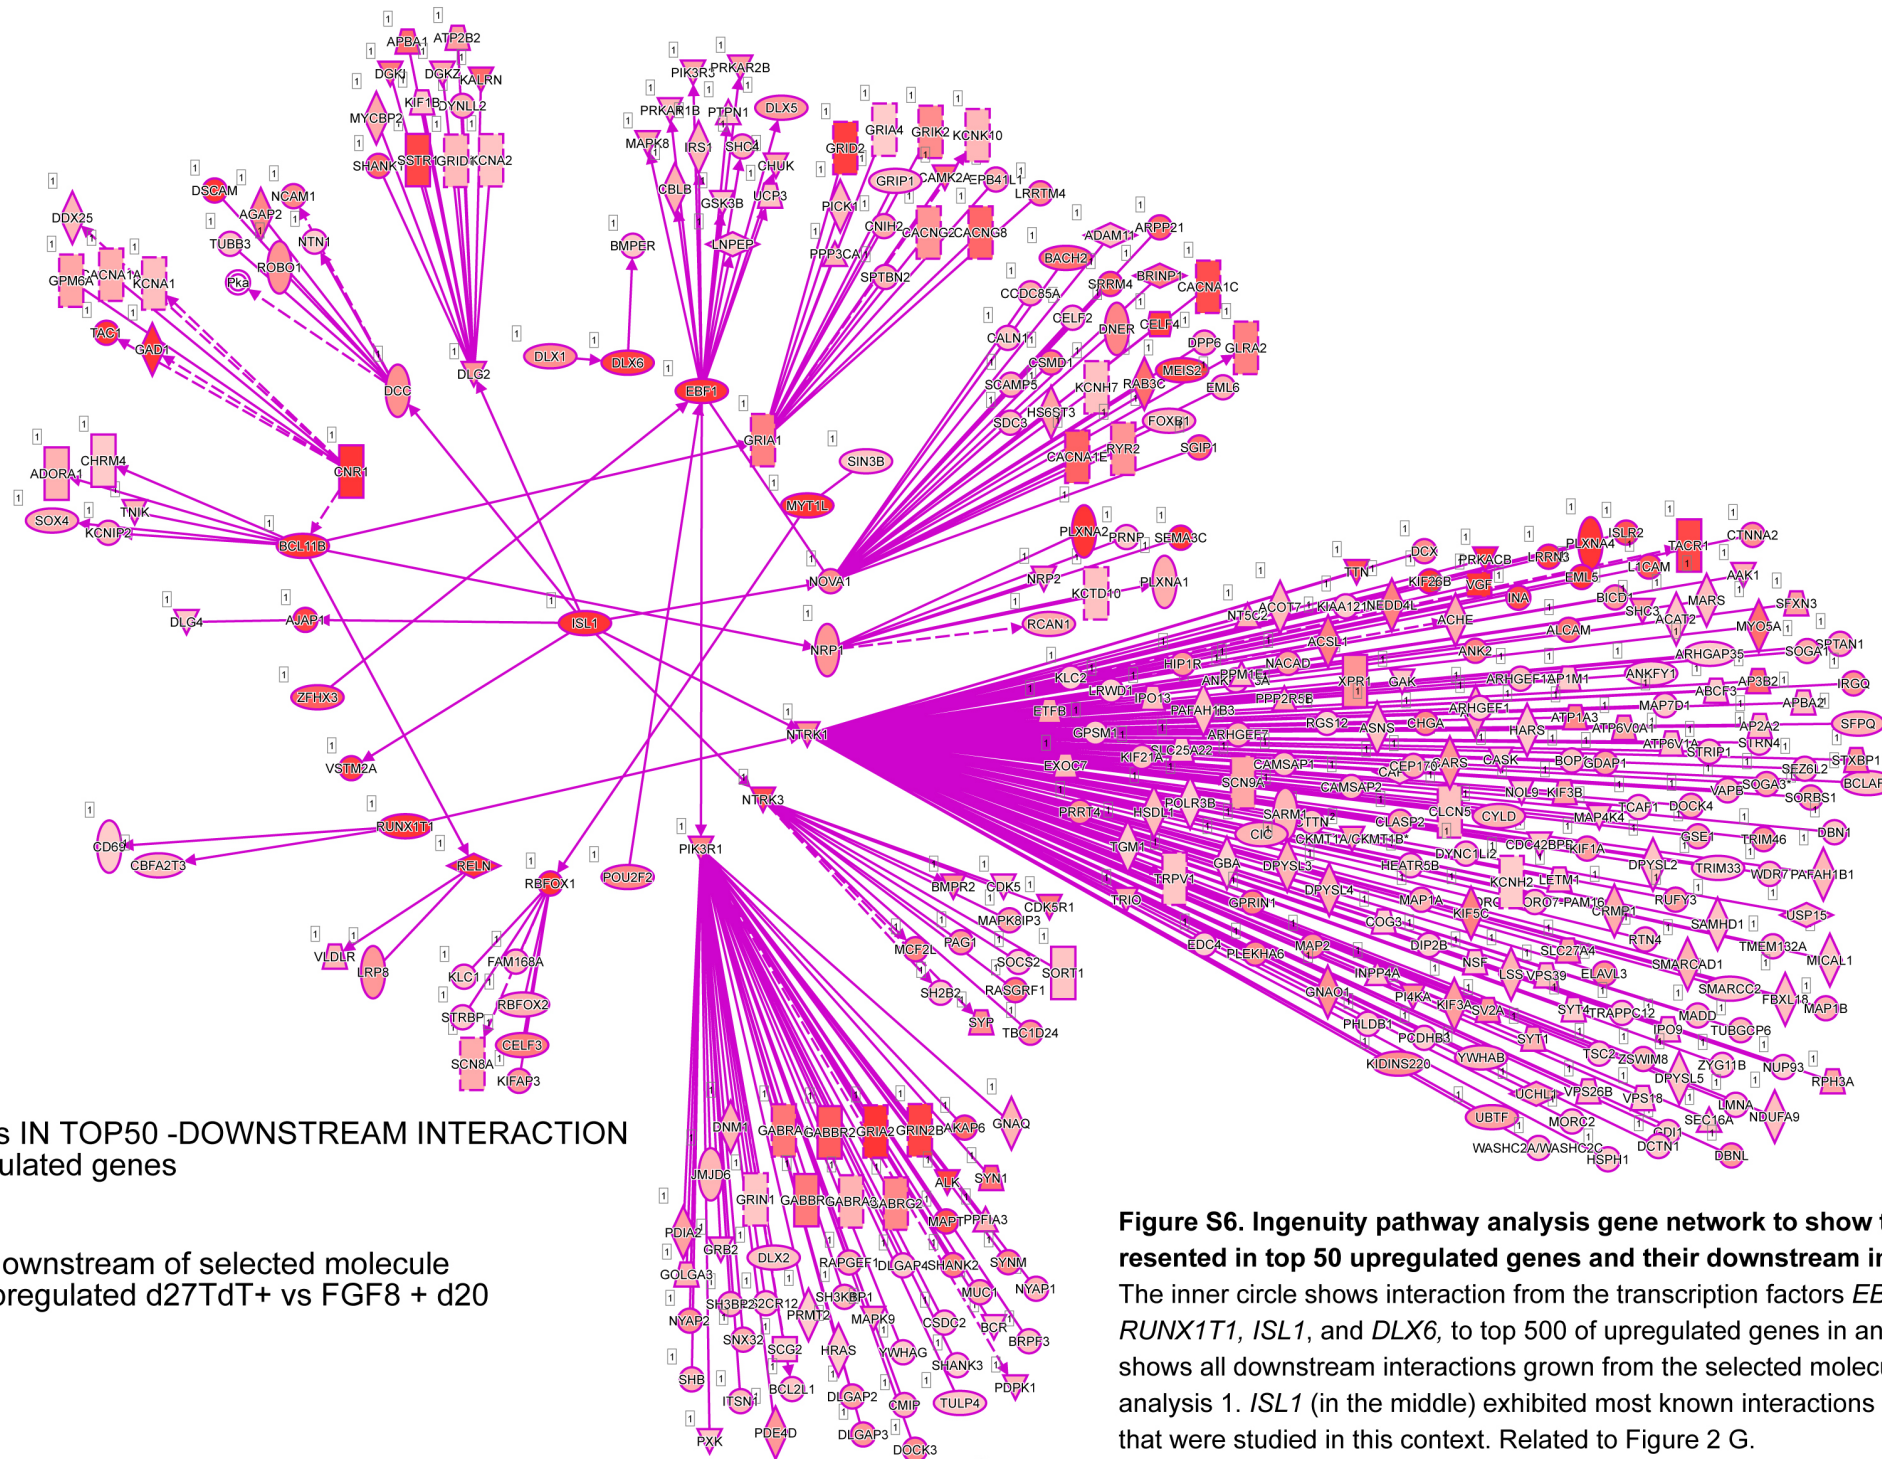

inner circle = TFs IN TOP50 -DOWNSTREAM INTERACTION to top 500 upregulated genes

outside circle = downstream of selected molecule - present in all upregulated d27TdT+ vs FGF8 + d20

**Figure S6.** Ingenuity pathway analysis gene network to show the transcription factors represented in top 50 upregulated genes and their downstream interactions within the data. The inner circle shows interaction from the transcription factors *EBF1*, *MYTL1*, *BCL11B*, *RUNX1T1*, *ISL1*, and *DLX6*, to top 500 of upregulated genes in analysis 1. The outer circle shows all downstream interactions grown from the selected molecules that are represented in analysis 1. *ISL1* (in the middle) exhibited most known interactions of the 6 transcription factors that were studied in this context. Related to Figure 2 G.

Figure S7

### Analysis 3 D27 TdT+ vs D20FGF8-non-treat

#### upregulated GO - BP (top 20 pathways)

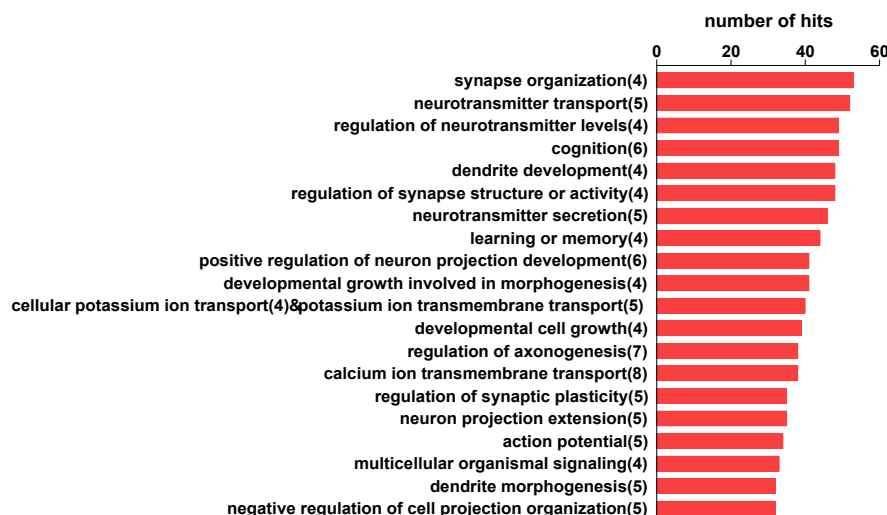

#### downregulated GO - BP (top 20 pathways)

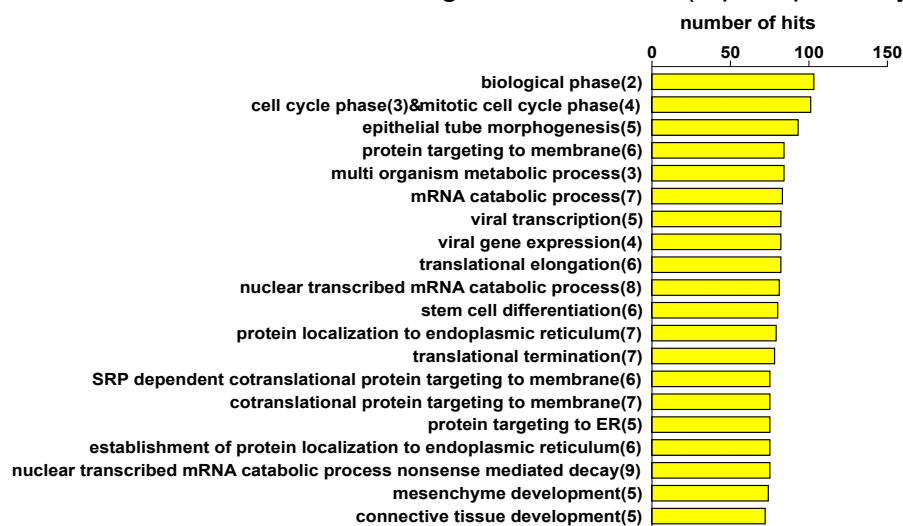

**Figure S7. Over-representation analysis of differentially expressed genes in D27TdT+ vs D20FGF8nt.**

The terms represent 'GO - Biological processes' that were over-represented in the upregulated (upper panel) and downregulated (lower genes) genes in analysis 3. 'Upregulated' refers to higher expression in TdTomato + cells, and 'downregulated' the opposite. The top 20 significantly over-represented pathways are shown (p-value <0.005). Number of hits = number of genes per pathway that are represented in the gene lists. Related to Figure 5, Analysis 3.

**Table S1. Differentially expressed genes at D25 between TdTomato-positive and -negative cell pool.** Related to Figure 1F.[Click here to Download Table S1](#)**Table S2. Top 50 upregulated and downregulated genes (D27TdT vs D20FGF8).** Related to Figure 2 C.[Click here to Download Table S2](#)**Table S3. Puberty and GnRH neuron development-associated genes that have been described in previous publications.**

Genes differentially expressed (in top 50 up-/downregulated genes, Figure 2 C), reported in association with human puberty timing/development ('Puberty'), or GnRH neurons / OP ('GnRH neurons') in human or animal studies. See Supplementary references.

| <b>UPREGULATED<sup>↑</sup></b> | <b>PUBERTY</b>                                   | <b>GNRH NEURON</b>                                  |
|--------------------------------|--------------------------------------------------|-----------------------------------------------------|
| <b>RELN</b>                    | Lintas and Persico, 2010 (1)                     | -                                                   |
| <b>TAC1</b>                    | Simalvi et al., 2015 (2, )                       | Maguire et al., 2017 (3)                            |
| <b>GRIA2</b>                   | -                                                | Vastagh et al., 2016 (4)                            |
| <b>GNRH1</b>                   | Day et al., 2017 (5, )                           | Wray et al., 1989 (6)                               |
| <b>EBF1</b>                    | -                                                | Chung et al., 2008, Kramer et al., 2000 (7, 8)      |
| <b>SEMA6D</b>                  | Day et al., 2017 (5)                             | -                                                   |
| <b>BCL11B</b>                  | Day et al., 2017 (5)                             | -                                                   |
| <b>PRKACB</b>                  | -                                                | Vastagh et al., 2016 (4)                            |
| <b>GAD2</b>                    | Witchel et al., 2009, Kokay et al., 2011 (9, 10) | Kokay et al., 2011 (10)                             |
| <b>KCNMA1</b>                  | -                                                | Nishimura et al., 2008 (11)                         |
| <b>GAD1</b>                    | -                                                | (10)                                                |
| <b>ISL1</b>                    | -                                                | Burger et al., 2018, Aguillon et al., 2018 (12, 13) |
| <b>SLC35F4</b>                 | -                                                | Burger et al., 2018 (12)                            |
| <b>VGF</b>                     | Pinilla et al., 2011 (14)                        | -                                                   |
| <b>PTPRN</b>                   | Yang et al., 2018 (15)                           | -                                                   |



| <b>DOWNREGULATED</b> | <b>PUBERTY</b>                                      | <b>GNRH NEURON</b>             |
|----------------------|-----------------------------------------------------|--------------------------------|
| <b>NOTCH1</b>        | Quaynor et al., 2016 (16)                           | -                              |
| <b>SOX3</b>          | Kim et al., 2018 (17)                               | -                              |
| <b>ASPM</b>          | Passemard et al., 2009 (18)                         | -                              |
| <b>AXL</b>           | Salian-Mehta et al., 2014 (19, 20)                  | Salian-Mehta et al., 2013 (20) |
| <b>GLI3</b>          | Burger et al., 2018 (12), Quaynor et al., 2016 (16) | Burger et al., 2018 (12)       |
| <b>HMG2</b>          | Zhu et al., 2010 (21)                               | Burger et al., 2018 (12)       |
| <b>SOX2</b>          | Jayakody et al., 2012 (22)                          | -                              |
| <b>SPARC</b>         | -                                                   | Provenzano et al., 2010 (23)   |

**Table S4. References from which all the pathway findings were collected (IPA ,Qiagen).** Related to Figure 2 E, F, and G.

[Click here to Download Table S4](#)

**Table S5. Primers used for qPCR presented in Figure S2.** Related to Figure 2C.

| <b>Gene</b>   |          | <b>Primers (5'-3')</b>    |
|---------------|----------|---------------------------|
| <i>RELN</i>   | Forward: | AGTGTCAGCTTGGAAATTTTCTACC |
|               | Reverse: | GGTCCAGCACAGATCTCAGG      |
| <i>SEMA3C</i> | Forward: | AATCTGGAAAAGGACGCTGC      |
|               | Reverse: | TCAGTTCTGACCGCATTCT       |
| <i>RBFOX1</i> | Forward: | ATGCCACAGCACGTGTAATGA     |
|               | Reverse: | AGACTGCACCCACAACCTGGATT   |
| <i>PLXNA2</i> | Forward: | GCAGGCAGACAGGCACAGCA      |
|               | Reverse: | ACAGAGAGGCAGGCGTCCGT      |
| <i>SCN2A</i>  | Forward: | GGTTTTATTGTGAGCCTTAG      |
|               | Reverse: | CTTGAAAACCTCGGAGCAGCCG    |
| <i>TAC1</i>   | Forward: | GCGACCAGATCAAGGAGGAAC     |
|               | Reverse: | AAAGAACTGCTGAGGCTTGGG     |
| <i>GNRH1</i>  | Forward: | TGCCAGTTTCCTCTTCAAT       |
|               | Reverse: | GTCAACTGGCAGAAACCCAA      |
| <i>ISL1</i>   | Forward: | GCGGAGTGAATCAGTATTTGGA    |
|               | Reverse: | GCATTTGATCCCGTACAACCT     |
| <i>BCL11B</i> | Forward: | TCTCGGGTGACGGGACTCA       |
|               | Reverse: | AAGGGCTGCTTGATGTTGTG      |
| <i>MYT1L</i>  | Forward: | AGAGAGCAAGTGTCCAACCC      |
|               | Reverse: | CTGTTGCTGTTGACATGCC       |

**Table S6. Antibodies used in Figure S3, 4, and 5. Related to Figure 2 C.**

| <b>Name</b>                 | <b>ANTIBODY</b>                           | <b>CAT NO.</b> | <b>COMPANY</b>                                 | <b>DILUTION</b> |
|-----------------------------|-------------------------------------------|----------------|------------------------------------------------|-----------------|
| RBFOX1                      | Mouse recombinant A2BP1                   | NBP2-13169SS   | NOVUS BIOLOGICALS                              | 1:125           |
| SEMA3C                      | Human/Mouse Semaphorin 3C Antibody(RAT)   | MAB1728        | R&D SYSTEMS                                    | 1:500           |
| PLXNA2                      | Anti-Plexin A2 antibody (RABBIT)          | ab39357        | Abcam                                          | 1:500           |
| SCN2A                       | Anti-SCN2A (Na <sub>v</sub> 1.2) (RABBIT) | ASC-002        | alomone labs                                   | 1:200           |
| PTPRN2                      | Anti-PTPRN2 (RABBIT)                      | HPA006900      | Atlas antibodies                               | 1:300           |
| SUBSTANCE P ( <i>TAC1</i> ) | Anti-Substance P (GUINEA PIG)             | ab10353        | Abcam                                          | 1:200           |
| DSCAM                       | Anti-DSCAM (RABBIT)                       | HPA0193224     | Atlas antibodies                               |                 |
| MAP2                        | Anti-MAP2 (CHICKEN)                       | CH22103        | NEUROMICS                                      | 1:1000          |
| GNRH                        | Anti-GnRH (SHEEP)                         | #2000          | gift from Prof. Erik Hrabovzky (PMID:25713511) | 1:4000          |
| GNRH                        | Anti-GnRH (GUINEA PIG)                    | #1018          | gift from Prof. Erik Hrabovzky(PMID: 22654828) | 1:16000         |
|                             |                                           |                |                                                |                 |
| <b>Secondary antibody</b>   |                                           |                |                                                |                 |
| Donkey-anti-sheep           | Antibody-CF <sup>TM</sup> 488             | SAB4600038     | SIGMA                                          | 1:1000          |
| Donkey-anti-guine pig       | Antibody-CF <sup>TM</sup> 594             | SAB4600096     | SIGMA                                          | 1:1000          |
| Donkey-anti-guine pig       | Antibody-CF <sup>TM</sup> 488             | SAB4600033     | SIGMA                                          | 1:1000          |
| Donkey-anti-mouse           | Alexa Fluor 594                           | A21203         | Invitrogen by Thermo Fisher Scientific         | 1:500           |
| Goat-anti-chicken           | Alexa Fluor 594                           | A11042         | Invitrogen by Thermo Fisher Scientific         | 1:500           |
| Donkey-anti-rabbit          | Alexa Fluor 594                           | A21207         | Invitrogen by Thermo Fisher Scientific         | 1:500           |
| Donkey-anti-rabbit          | Alexa Fluor 488                           | A21206         | Invitrogen by Thermo Fisher Scientific         | 1:500           |
| Donkey anti-rat             | Alexa Fluor 594                           | A21209         | Invitrogen by Thermo Fisher Scientific         | 1:500           |

**Table S7. All overlapping genes upregulated or downregulated in both analyses 2 and 3. Related to Figure 5.**

[Click here to Download Table S7](#)

**Table S8. References from which all the pathway findings were collected (IPA ,Qiagen). Related to Figures 5 D, and E.**

[Click here to Download Table S8](#)

## Supplementary Materials and Methods

The background information on how the genome editing to generate a reporter into the *GNRH1* gene of human pluripotent stem cells was planned. Related to Figure 1 and Materials and Methods in the main text.

### 1. Design of GNRH1 reporter cell line, genome editing by CRISPR-Cas9

GNRH1 Genomic sequence:

Homo sapiens gonadotropin-releasing hormone 1 (luteinizing-releasing hormone) (*GNRH1*), RefSeqGene on chromosome 8  
NCBI Reference Sequence: NG\_016457.1

[GenBank Graphics](#)

>gi|285026423:5001-10783 Homo sapiens gonadotropin-releasing hormone 1 (luteinizing-releasing hormone) (*GNRH1*), RefSeqGene on chromosome 8

**Bold** = exon

**Stop codon**

```
AATTTCTCATCTTTCTGTTCCCACTGCCCTTAAGAGTGATTTGCATATTTAACTCAATAAGCATCTACTG
AAATGAGTTGATCTGTTGATGTAAGTCTGCTCAATATGGTCTTGCTCTCAGAAATATGTTTCTGCCTTTT
TGATGCTTTTAGAAGGCTTTCAAGGTAAGTCAAGCAGGGAACCTGGTGGGTAGATGAGGGAATTTCAAAC
ACACAACCTGCTGATTTAGGATCCTACATGGACTTGGTATATAGTGTCACTTACTTGTAAATCAGATTTT
TAAAATTGGAAGCAACTCTGTGATCATCTAGTCCATCTAGCTACACCCTTCTTTTACAAATGAAGAAT
CCAAGAGCCAGAAGCTCCCAGACATCCTGACTCAATGTCCATATTTTGTGTATAGCCTCCTTTGTGGAA
GTTATGTATGCATTTGACTTCACTTAATCTAAGACATCTATTTTCTTGAACCTTTGATAGGCTGCTGG
TTTCTCAAGGGAATCCAATCTAGCTGGATTTTAATCTCTTTGAATTGTGTCTCAGCTATAAAAAGTTT
AGCTGAGGTTTTAATGGCTGCCTTAAGTAAATCTAACAGATATACCAGGGGTGTTCCAATTACATACA
CCATTAAAGGGCTTTATGTGAGGATTTTTAAAAATTACCATTAAGGGAAGGATAGTCCATTTGCA
GTATAATTTACCAGCAGGAAAGATTTCAATGTCTGGAAAAATTCCTATAAAAAGGAAGATAGGAAAAC
AGAAAAGTCAAGTACTCAACTACTTCAAGGGAAGATTGGGATCTTTTGGCTCTCTGCCTCTAACACAG
GTAAAAGGCTTTGTATTATTTCTAGCAGGATTTTCTTCTTTAGATTGCATGCTATTGTATGCTACAG
GGCATTGACAGCCCAAGGGCTAAATCCAGGTGTGACGGTATCTAATGATGTCTGTCTTCACTGTCTCT
TGCCATCACCAGCCACAGAGATCCAGGCTTTGGGACTCCCACAGCTTATCGACCAGTGTGTTGATTTAGT
TTTTAGCCTCTTTCCCATCAAATGAAAATTAACCTTGGAGACACATTTTATTAGAAAATTAGAGCCCCCT
TGGCTAGGAAGGCATCTGGTCTGGGACTAACTACTTTGAACAGTGTGAGTCTCTCTCCCACAGATGGT
TCAGCTAGCAGTAATGTAGGAAGACTGAAGGATAAATAGAAAAATGTCAATAGTACCATGGGGTAGCCA
TGTAATGTCAAGCAATTTATATAGCCAGAGATTCCTAGTAGGAGACTTTTCTTAACAGATGACTCA
GTTCTCTTTATCTCAGGAATGAAAGAGTTGAAGACCAATCCCAACAGGGGAATGTTAAGGCAAAATGA
TGAACCTGATAAGGGATGAATTATGGGGTTGGATAACCAACAATAAAAATAAAAAGTATAGACTATTTT
AGTACTAAAAGGTCCTGAACATGTGAGCTTAAGTACTCATTTTGTCCCAGTGGCTAAGAACTAAAGG
CAAGCCAGCAAGTGTCTCTGAGTTTCAAGTGTCTGTATGTAAGAACTGACTCTGACTTCCATCTTCTGCAG
GGTTAGTGATACAGATGCTAGCTTTTTCACTAAAGAGGCTTTTGTAGTTTATACTCAACCTTGTCTGGATC
TAATTTGATTTGTCATTATGTCCTTAGAATGAAGCCAATTCAAAACCTTAGCTGGCCTTATTCTAC
TGACTTGGTGCCTGGAAGGCTGCTCCAGCCAGCACTGGTCTTATGGACTGCGCCTGGAGGAAAGAGAGA
TGCCGAAAATTTGATTGATTCTTTCCAAGAGGTAAGTTTTCTCTCAGCTTCAAATAAGACATAGTGATTT
TATTCATTTAACTATATTAACATTCAGGATAGCCCAATGTCAATATCTATGATGTTGTACCCTAGA
TGCTCCAGGTGAGATAAGGCACCTACAAAGTAGAAGTCCCATCTTCTACTTTTCAAGTTCACACAGGGACTAA
ACAAAGAGCTGGAAAAATCCAAAAGAATATATTAATAGCAACAAGTGTGAGACAGCACGTCATCTACTCTG
AGTGTATGGGATTGCTAAAGGAATTAGAAACAATGGGATAGGGTCAAGGTCGTATCAGAAGATGATTCT
TTGGGATTTGGAAAAACGTTAGAACTTCGTTTTTTTTTCTCATTTCATCTTTAAACATATCTATGC
TATTAGATCAGTACATTTTTATAATTTATAAATGAGTATCCTTATCAAGGATGCATGCCCTATAATTTCT
TTTCACTGATAGGGGCATTTAAGCAAAAGTTGGAGACTGGTAGAATACAGGAATTAGCAAACCTCAAGATGA
TAAGATAACGTAGTAGAAAACATGCTGATTTAAATTCATATAGATTAGATTATAGGACTGGCACCAACAC
TAACGTGAGGTACTTGTCTTCTGTTTTTGGGGTATTTTTCTAAGACAGGGTCTCGCTGTGTTATCTAG
GCTGGAATTTAGTGGCACGATCACAGCTCACTGCAGCCTTGACTTCTTGGGCTCAAGTGATCCTCCACC
TCAGCCGTCTGCATAGCTGGGACCACAGGCATGCATATCACACCAACTAATTTTTAAAACTTTTATA
GAGATGGGGTTTTCCCTATGTTGCCAGGCTGGTCTCAAACCTCTGGGCTCAAGGATCCTCCACCTTGG
CCTCCCAAAGTGCCGGGAGGATTTTTGTTTTATAAATATGACCACCTCATCAGGGTCATGTAAGGAAAGAA
```

GCCATCTATGTTAGCTGATTAACCTGAAAAATAACCTAGGACTGAGAATGGGAAAAATTTTAAATCATTTCATTATCATTGGAAGGAATTATCTCTTTTCTGAGAAAAATAAAGATAATTTAGTATTAAGAGACCCGAATCTGAAGCCTCTTCTCTGCAGGTTATACATGAAGCAAATCTCATTGAACATAACATATTTAGTAAACCTAGAAAAATAAAAACCAACCTTTTTTTTACAACATAAACTCTTGGGGGTTTTTTGCTTTTTTGTTTTTTGGGTATACTGACTCTCATGAGGCTCAAAGTGCCTCCCTCTTTTCATCTTTAAGGGGAAAAATATGATATCTTCTTACTGTCTCCATTATCTCCAGATCCCCATGCCATTCCAGTAGAAATGTCAGATGGCAGATCTGTGTCTTAAAGTCCCTATGCTAATCTGCAACTTTCCCAATCTCCCCAGCCCCACATCCCCCTTGACCCCACTCCACAATTTTTTGGTGGAAATGGAACACCCATTTTCATTTCTTTATCTCCATCTCAAAGCATCACATCTCTTTCTTCAGATAGTCAAGAGGTTGGTCAACTGGCAGAAACCCCAACGTTTCAATGCACCACGCACAGCCAGTTCTCCCTCCGAGACTGAAAGGAGCTCTGTGTAAGTTAAAGTGATCATAACATGATCACAGCATAGAGCTCTAGAGGTGGATAAGCCTTTGGGGATCACTTAGGACAGCTACCTCCCAGATACTGTGGGGCTTACATTCCTGACTCCTCTGTTACCTCCTGTGGTAGGACCGTGTTCATGACAAATCCAGTTGGTGGTTAGACAGCACTAGGGGCTGAAACGTTTTTTTTGTTTTGTTTTTCTGAAAGTTGAATTGAAATCTCTGTACTTTTTATCTCTAATCTGGTTCTAGCTTTTGGGATAACTAACAAAACAAATTTCTTCCCACTGCTGCAATTCATTTCTTCAAGTAAAAATCACCAACCCCTAGACTACTCCACTCCAGCTACTCCACAGCCCTCCACCTGATCCTGCAACTGTGCTTTATCTTACATGGTTTTCCAGAACCTTGGGGAATAGAGACATGAGAAACA CTGCTGTAGATGGGTTTTTTTTTCTCTTCTTGGAAATGAAAAATGCCAAACTACTAAATTTATAATTTAGAGAGTGATGGACTTGATTTCCAGTTTCTCTGATAGGACAATAATCACCTCCAAATTCGCCCCCCAAAATG GAAATACACTAATCATATTAGGTTTTTGGATGAAAAAGTATAAAGAGAATTGAATGTATAAATGAATCTT TTAAAAAAATTTATTTGTTGAGACAGGATCTTGTCTGTTCCCGGGCTAGAGTGCAATGGTGCAATCAAT GCTCACACAGCCTCAACCTCCAGGCTCAAGCAATTTCTGGAGACTAGATTAGCCTCTCTAGTAGCTGGG ACTATAAGCACTTGCCACCACACCCAGCTGATTTATTTTTTAATTTTTTGTAGAGACAGGGTCTATGTT GCCCAGGCTGGTCTCAAACCTCCAGCCTCAAGATCCTCCCAAAGTGCTGGGATTAAGGTGCAAGCCACT GTGCCTGACTTAAAGTTGAATCTTGGATTCAATGTTGATATTTCTGATCTCTATTGTCCACTTATCTGCA GCAATCAGAAGCATTACAGTTAATGATCAGTTATGCCTAGGAGCTGGGAAAGCCCAAATAATCATATA TAAAAATAAGCTGAATTTAATTTGTCTACAGTGACTTCAACTTAATATACCCACAGAACAAGAAAAAA GTGGGCAGACGTCGTTATTTCTTTTTCTTTTTTGGAGTGCAGTGGCGCAATCTCGGCTCAATGCAA CCTCCATCTCCTGGGTTCAAGCGATTCTCCTGACTCAGCCTCCCGAGTAGCTGAGATTACAGGCATGAGC CACCACACTGGACTAATTTTTGTATTTTTTAGTAGAGATGGGGTTTACCATGTTGGCCAGGATGGTCTCA ATCCCTAACCTTGTGATCCGCCACCTCGGCTCCCAAAGTGCTGGGATTACAGGCATGAGCCACCACG CCCAGCCTATTTCTTTTTCTAATCTTGCTTACTGCATTACAAAAATGGCAAGCAGTGAATTTGT CAAACATGACATTATGAAGAAATTTGAAGCAAAGGCTGGTTTTAATAGCAAAGTAATTGACCAGACTTTTTT **TCACTTCTTCTCACAACCTCATCC**TAAACTATTAATGTAGATTTTATGTATATTAAGTGCTTAAAAA GACCCAATCGGCCAGGCACAGTGGCTCATGCCGTGAATCCTAGCATTTTGGGAAGCCGAGGTAAGTG GAT CACTTGAGGCCAGGAGTTCAAGACCAGCCTGGCCAACATGGTGACACCCTGTCTCTACTAAAACATAAAA AATTAGCCAGATGCGGTGATGCATGCCTGCAATCCCAACTACTAGAGAGGCTGAGGCACGAGAATCATT GAACCTGGAAGGTGGAGTTGCCATGAGCTGAGATCATACTACTGCACTCCAGCCTGGGTGACAGAGTGA GGTCTGTCTCAAAAAAACCAGAAAAACAACCCAAATTTATCATGTCTCCCTAGCACTAACTA GAGCACAATAAACAAGACCAATTCCTCCAGACTGATATTTAGAAATTAATGTCAAATGTAATG AAATTCAGCTGGTAAAGTCAGTCTTGATATATTTGTTATATATTTTTTCCAGGAAAGTCTGATT**GAAGAGGA** **AACTGGGCAGAAGAAGATTAAATCCA**TTGGGCC**AGAAGGAATGACCATTACTAACATGAC**TTAAGTATA ATCTGACATTGAAAATTTATAACCCATTAAATACCTGTAAATGGTATGAATTTCAAGAAATCCTTACACC AAGTTGCACATATCCATAATAAAGTGCTGTGTGTGTAATGAAGTGGCATAACCTGTAAATCTTTCTCCAACCTCAGAACTCCGGG GAAGGATCACTGTAAACCCACCAAGGGAGCCCTCCATGTGTATACAGGTGGCAGATGGGAGGCAGGTAAGATAAAGTGTCTG TTGTTGACAAAAGGATCTCAGGCTCTCCAGCACCCATACCTGCATCTACCCACAAGCAGAACAGCCACATACTGGTCCAGCCAG AAAAAAGCTGATTCAGCTCCAGTTTCTCTGGGATTATACTTTATCTTCGACCATACTCTTCAGAAGTTGAGGTGGGGCCACGGCCA AGGCTTTCTTCCACTTGGAAGAAGTTCCCTCCCTTGATCGTCTCCAAACCTTTGAAAGTTTACTGGAACCCAAATGAGGCCTGG GGGTAAGGAGAGGGGCTCCAAAGGACTCCTAGTCCAGCGCT**CCTTCTGGTCCCACGCAATCT**ATCCAAGTGGTGCACACT G AGGGTTGGGACTGAGACCTA AAAAAATAATAGAGTGTTCATCTGCTTGATCTGTTGGTTTGCATTTAAGAAACACAATGGAGTACAGACAGCCGTTGGAGATGGG ACTCTATTGTTCCATGTCCCTT

## 2. RNA guide oligo

"Guide 3:"  
 5'- GTGGAAAGGACGAAACACCg **GAAGAAGATTAAATCCATT** gtttagagctaGAAAtag  
 -3'

### 3. Homologous arms

Primers designed for H9 GDNA cloning of homologous arms:

|                    |                                                                                                                                                                  |            |
|--------------------|------------------------------------------------------------------------------------------------------------------------------------------------------------------|------------|
| 5ha_GNRH1_BamH1_F  | <b>gcatGGATCC<sup>BamH1</sup>TCACTTCCTTCCTCACAACATCATCC</b>                                                                                                      | TM<br>62.2 |
| 5ha_GNRH1_NheI_R   | <b>gcga GCTAGC</b><br><b>AATCTTCTTCGCCAGTTTCCTCTTC</b><br>(GAA GAG GAA ACT GGG CAG AAG AAG ATT <u>GCTAG</u> <sup>C<sub>NheI</sub>tcgc<sub>overhang</sub></sup> ) | TM<br>63.7 |
| 3ha-GnRH1-AscI-Fw: | <b>gcat GCGCGGCC<sup>AscI</sup></b><br><b>AGAAGGAATGACCATTACTAACATGAC</b>                                                                                        | TM<br>59.2 |
| 3ha-GnRH1-XbaI-Rv: | <b>gcatt TCTAGA AGATTGCGTGGGACCAGAAG</b><br><b>(Reverse: <u>CTTCTGGTCCCACGCAATCT</u> <u>TCTAGA<sup>XbaI</sup></u>)</b>                                           | TM60.0     |

### 4. Primers: Detection of Donor template introduction

Design of primers for insertion detection

#### Primer pair 1:

Forward : **CCACGCCAGCCTATTTCTTT**

Reverse (compliment): **gatgacctcctcgccttgc**

#### Primer pair 2:

Forward : **ggtccctcgaagaggtcac**

Reverse (compliment): **CGGTCTGTCTGTACTCCATTGT**

#### Gnrh1 sequence

Donor template integrated correctly

GCAATCAGAAGGCATTACAGTTAATGATCAGTTATGCCTAGGAGCTGGGAAAGCCCAAATAAATCATATATAAAAAATAAGCTGTAATTTTAA  
 TTGTCTACAGTGACTTCAACTTAATATACCCACAGAACAAGAAAAAGTGGGCAGACGTCGTTATTTCCCTTTTCGTTTTTTTTGGAGTGC  
 AGTGGCGCAATCTCGGCTCAATGCAACCTCCATCTCCTGGGTCAAGCGATTCTCCTGACTCAGCCTCCCGAGTAGCTGAGATTACAGGCAT  
 GAGCCACCACACTGGACTAATTTTTGTATTTTTAGTAGAGATGGGGTTTCCACCATGTTGGCCAGGATGGTCTCAATCCCTTAACCTTGTGAT  
 CCGCCACCTCGGCTCCCAAAGTGCTGGGATTACAGGCATGAGCCA **CCACGCCAGCCTATTTCTTT**CTTTTTCTAAT  
 CTGCTTACTGCATTACAAAAATGGCAAGCAGTGAAATTTGTCAAACATGACATTATGAAGAAATTGAAGCAAAGGCTGGTTTAATAGCAA  
 GTAATTGACCAGACTTTTTTTT **TCACTTCCTTCCTCACAACATCATCCTTAAACTATTAATGTAGATTTTATGTATATTAAGTGCTT**  
**AAAAAGACCCAATCGGCCAGGCACAGTGGCTCATGCCTGTAATCCTAGCATTTTGGGAAGCCGAGGTAAGTGGATCACT**  
**TGAGGCCAGGAGTTCAAGACCAGCCTGGCCAACATGGTGACACCCTGTCTCTACTAAAACTATAAAAAATTAGCCAGATG**  
**CGGTGATGCATGCCTGCAATCCCAACTACTAGAGAGGCTGAGGCACGAGAATCATTTGAACCTGGAAGGTGGAGGTTG**  
**CCATGAGCTGAGATCATACTACTGCACCTCCAGCCTGGGTGACAGAGTGAGGTTCTGTCTCAAAAAAAAAAAAAACCAGAA**  
**AAACAAACCCAATTTATCATGTCTCCCTAGCACTAACTAGAGCACAAAAACAAACAGACCAATTCCTTCCAGACTGATATT**  
**TTAGAAATTAATGTCAAAATGTAATGAAATTCAGCTGGTAAAGTCAGTCTTGATATATTTGTTATATATTTTCAGGAAA**  
**GTCTGATTGAAGAGGAAACTGGGCAGAAGAAGATT\_GCTAGCGTGCAC**ggctccggagagggcagaggaagtctgtaacatgcggtgacg  
 tcgaggagaatcctggcccaATCGATGGTccaaaaagaagagaaaggtatTCGATGGTccaaaaagaagagaaaggtatTCGATatgtgta **gca**

**agggcgaggaggtcatc**aaagagttcatgcttcaaggtgcatgaggggctccatgaacggccacgagttcgagatcgaggcgaggcgaggcg  
cgccctacgaggccaccagaccgccaagctgaaggtgaccaagggcgccccctgcccctgctggacatcctgtccccagttatgtacggctcaaggcgtag  
tgaagcaccgcccgcacatccccgattacaagaagctgtccttccccgagggtcaagtgaggagcgcgtgatgaactcgaggacggcggtggtgaccgtgaccagga  
ctcctccctgcaggacggcagcgtgatctacaaggtgaagatgctggcaccactccccccgacggccccgaatgcagaagaagaccatgggctgggaggctccac  
cgagcctgtacccccgacggcgtgctgaagggcgagatccaccagccctgaagctgaaggacggcgccactacctggtgagttcaagaccatctacatgcca  
agaagcccgtgcaactgcccggctactactactggtgacaccaagctggacatccaccacacgaggactacaccatcgtggaacagtacgagcctccgagggccg  
caccactgttctgggcatggcaccggcagcaccggcagcggcagctccggcaccgctcctccgaggacaacaatggccgtcatcaaaggttcatgcttcaag  
gtgcatgaggggctccatgaacggccacgagttcgagatcgaggcgaggcgaggcgccccctacgaggccaccagaccgccaagctgaaggtgaccaagg  
cgccccctgcccctgctggacatcctgtccccagttcatgtacggctcaaggctacgtgaagcaccgcccgaatccccgattacaagaagctgctccccga  
gggctcaagtgaggagcgcgtgatgaactcgaggacggcggtggtgaccgtgaccaggaactcctcctgagagcggcagcgtgatctacaaggtgaagatgctgg  
accaactccccccgacggccccgtaatgcagaagaagaccatgggctgggagggctccaccgagcgcctgtacccccgacggcggtgctgaagggcgagatccacc  
aggcctgaagctgaaggacggcgccGctacctggtgagttcaagaccatctacatggccaagaagccgctgcaactgcccggctactactactggtgacccaagtg  
acatcactcccacaacgaggactacaccatcgtggaacagtacgagcgtccgagggcgccaccacctgtcctgtacggcatggagcagctgtaacagtaaTTTAAA  
GAATCCGCCCCCCCCCCCTCTCCCTCCCCCCCCCTAACGTTACTGGCCGAAGCCGCTTGAATAAGGCCGGTGTGC  
GTTTGTCTATATGTTATTTCCACCATATTGCCGTCTTTGGCAATGTGAGGGCCCCGAAACCTGGCCCTGTCTTCTTGA  
CGAGCATTCTAGGGGTCTTTCCCTCTCGCCAAAGGAATGCAAGGTCTGTTGAATGTCGTGAAGGAAGCAGTTCCTCT  
GGAAGCTTCTGAAGACAAACAACGTCTGTAGCGACCTTTGCAGGCAGCGGAACCCCCACCTGGCGACAGGTGCCT  
CTGGCGCCAAAACACCGTGTATAAGATAACCTGCAAGGGCGGCAACCCCAAGTCCACGTTGTGAGTTGGATAGTT  
GTGGAAGAGTCAAATGGCTCTCCCTCAAGCGTATTCAACAAGGGGCTGAAGGATGCCAGAAGGTACCCCATTTGATGG  
GATCTGATCTGGGGCCTCGGTGCACATGCTTTACATGTGTTTGTAGTCGAGGTTAAAAAACGCTTAGGCCCCCCGAACCA  
CGGGGACGTGGTTTTCTTTGAAAAACACGATGATAATATGGCCACAACCATGACCGAGTACAAGCCCACGGTGCCT  
CGCCACCCGCGACGACGTCCCAGGGCCGTACGCACCCTCGCCGCGCGTTCGCGGACTACCCCGCCACGCGCCACA  
CCGTGATCCGGACCGCCACATCGAGCGGGTCAACGAGCTGCAAGAAGTCTTCTCACGCGCGTCCGGCTCGACATC  
GGCAAGGTGTGGTTCGCGGACGACGGCGCCGCGGTGGCGGTCTGGACCACGCCGGAGAGCGTCAAGCGGGGGCG  
GTGTTCCGCGAGATCGGCCCGCGCATGGCCGAGTTGAGCGGTTCCCGGCTGGCCGCGCAGCAACAGATGGAAGGCCT  
CTGGCGCCGACCCGCCCCAAGGAGCCCGCTGTTCTGGCCACCGTCCGGCTCTCGCCGACCCAGCCAGGCAAG  
GGTCTGGGACGCGCGTCTGCTCCCCGAGTGGAGGGCGGCGCGCGGGGTGCCCGCTTCTGGAGACCT  
CCGCGCCCCGCAACCTCCCCTTCTACGAGCGGCTCGGCTTACCCTCACCGCGACGTGAGGTGCCGAAGGACCG  
CGCACCTGGTGCATGACCCGCAAGCCGGTGCCTGACGCCCGCCCCACGACCCGACGCGCCGACCGAAAGGAGCG  
CACGACCCCATGCAATGaaGATCTAGAGCTCGCTGATCAGCCTCGACTGTGCCTTCTAGTTGCCAGCCATCTGTTGTTG  
CCCCTCCCCGTGCCTTCTGACCCTGGAAGGTGCCACTCCCCTGCTTTCTAATAAAATGAGGAAATTGCATCG  
CATTGCTGAGTAGGTGTCATTCTATTCTGGGGGTGGGGTGGGGCAGGACAGCAAGGGGGAGGATTGGGAAGACAAT  
AGCAGCATGCTGGGGTGGGTGGCTTATGGCTTCTGAGCGGAAAGAACCTGCAGCCCAAGTGGCGTATCA  
TGGTCATAGCTGTTTCTGTGAAATTGTTATCCGCTCAAAATCCACACAACATACGAGCCGGCAATTCCgatattcaata  
acccttaataactctgataatgtatgctatacgaagttattaggtctgaagaggattacgctcagccaagcttaggatctgacactgaaattctaccgggtaggggagcg  
ttttccaaggcagctgtagatgctgcttagcagccccgctgacactggcgtacacaagtgccctgctcgcacacattccacatccaccgtagcccaaccgctc  
cgttcttgggtgccccctgcccacccttactcctcccctagtcaggagttccccccgccccgagctcgcgtcgtgacagcgtgcaaatggaagtagcacgtctacta  
gtctcgtgacatgacagcaccgctgagcaatggaagcgggtagccttggggcagcggccaatagcagcttctcctcgttctggcctcagcagctgggaaagggtg  
gtccggggcggggctcagggcggggctcagggcggggctcagggcggggctcagggcggggctcagggcggggctcagggcggggctcagggcggggctc  
ctctccatctcgggcttctgacactgacatctagatctcagcagctgaagctaccatgaccaggtacaagcccaggtgctcctcggcaccgcccagcagctcccc  
agggcgtacgaccctcggccgctgctcggactaccgcccacgcccacaccgctcagcagcgggacccgacatcgagcgggtcaccgagctgcaagaactcttctc  
acgctcgtcgggctcagcagcaggtggtggtcggcagcagcggcgccgctggtgctgacacgcccggagagcgtcgaagcggggcggtggtcggcgaga  
tcggccgctcagcagcaggtgagcgttccggctgcccgcgagcaacagatggaagcctcctggcggcaccggccaaggagcccgctggttctgcccacc  
gtcggcgtcgcggcaccaccagggcaaggctcggcagcgcctgctgctccccgagtgaggcgggcgagcgcgggggtgcccgctcctggagacctccg  
gccccgaacctcccctctacgagcggctcggctcaccgtcaccgcccagcgtcaggtgcccgaaggaccgcccacctggtgcatgaccgcaaagccggtgctgacg  
cccgccccacgaccgacgcccgaccgaaaggagcgcacgacccccatgcatgatatacagatccccgggatgcagaaatgatgatctataaacaataaagatgt  
ccactaaaatggaagtttctgtcactcttctgataatggttcatagttgataatcataatgaaacaagcaaaacaaataaggccagctcctcccactcatgat  
atagatctatagatctcgtgggacattgtttctctgattcccacttgggttaagctactggttccaatgtgctcagtttcatagcctgaagaacgagatcagcagcctctgt  
ccacatacacttactcagattgttttcccaagtttaattccatcagaagctggtcgagatcccgaaccttaataactctgataatgtatgctatacgaagttatta**ggtc**  
**cctcgaagaggttac**taGGCGCG\_CCAGAAGGAATGACCATTAACATGACTTAAGTATAAATTCTGACATTGAA  
AATTTATAACCCATTAAATACCTGTAATGGTATGAAATTTAGAAATCCTTACACCAAGTTGCACATATCCATAATAAAGT  
GCTGTGTTGTGAATGAAGTGGCATACTGTTAAATCTTTCTCAACTCAGAAGTCCGGGGGAAGGATCACTGTAAACCCA  
CAAAGGGAGCCCTCCATGTGTGTATACAGGTGGCAGATGGGAGGGCAGGTAAGATAAAGTGTCTGTTGTTGACAAAAG  
GGATCTCAGGCTCTCCAGCACCCATACCTGCATCTACCCACAAGCAGAACAGCCACATACTGGTCCAGCCAGAAAAG  
CTGATTACAGCTCCAGTTTCTCTGGGATTATAACTTTATCTTCGACCATACTCTCAGAAGTTGAGGTGGGGCCACGGCCA  
AGGCTTTCTTCCACTTGGAAAGAAGTCCCTCCCTTGATCGTCTCCAAACCCTTTGAAAGTTACTGGAACCCAAATGAG  
GCCTGGGGTAAGGAGAGGGGGCCTCCAAGGACTCCTAGTCTCAGCGCTCCTTCTGGTCCCACGCAATCTaTCCAAGTGG  
TGACACTGAGGGTTGGGACTGAGACCTAAAAATAATAGAGTGTTCATCTGCTTGATCTGTTTGGTTTGCATTTAAGAAAC**ACAA**

**TGGAGTACAGACAGACCG**TTGGAGATGGGACTCTATTGTTCCCTATGTCCCCT

### 5. PCR detection on homologous arms integration into GDNA in GNRH1, (Figure 1 B)

| Touchdown PCR of GNRH1 homology arms           |             |             |                  |         |         |     |
|------------------------------------------------|-------------|-------------|------------------|---------|---------|-----|
| <b>5p:</b> 5ha-GNRH1-BamHI-F 5ha-GNRH1-NheI-Rv |             |             |                  |         |         |     |
| <b>3p:</b> 3ha-GNRH1-XbaI-R 3ha-GNRH1-Ascl-F   |             |             |                  |         |         |     |
|                                                | 1x<br>(uL)  | 13x         | Thermal cycle    | 5p      | 3p      |     |
| 5x HF buffer                                   | 4,0         | 52,0        | 1x               | 98°C    | 98°C    | 3'  |
| dNTPS(2.5mM)                                   | 1,6         | 20,8        | 8x               | 98°C    | 98°C    | 10" |
| DMSO(100%)                                     | 0,2         | 2,6         | down 0.5°C/cycle | 73-69°C | 67-63°C | 30" |
| Fw(10uM)                                       | 1,0         | 13,0        |                  | 72°C    | 72°C    | 20" |
| Rv(10uM)                                       | 1,0         | 13,0        | 30x              | 98°C    | 98°C    | 10" |
| Phusion                                        | 0,2         | 2,6         |                  | 69°C    | 63°C    | 30" |
| Betaine                                        | 4,0         | 52,0        |                  | 72°C    | 72°C    | 20" |
| H2O                                            | 7,0         | 91,0        | 1x               | 72°C    | 72°C    | 8'  |
| DNA                                            | 1,0         |             |                  |         |         |     |
| <b>TOTAL</b>                                   | <b>20,0</b> | <b>á 19</b> |                  |         |         |     |

## Supplementary references

References described in Table S3.

1. Lintas C, Persico AM. Neocortical RELN promoter methylation increases significantly after puberty. *Neuroreport*. 2010 Jan 27;21(2):114-8.
2. Simavli S, Thompson IR, Maguire CA, Gill JC, Carroll RS, Wolfe A, et al. Substance p regulates puberty onset and fertility in the female mouse. *Endocrinology*. 2015 Jun;156(6):2313-22.
3. Maguire CA, Song YB, Wu M, Leon S, Carroll RS, Alreja M, et al. Tac1 Signaling Is Required for Sexual Maturation and Responsiveness of GnRH Neurons to Kisspeptin in the Male Mouse. *Endocrinology*. 2017 Jul 1;158(7):2319-29.
4. Vastagh C, Rodolosse A, Solymosi N, Liposits Z. Altered Expression of Genes Encoding Neurotransmitter Receptors in GnRH Neurons of Proestrous Mice. *Front Cell Neurosci*. 2016 Oct 7;10:230.
5. Day FR, Thompson DJ, Helgason H, Chasman DI, Finucane H, Sulem P, et al. Genomic analyses identify hundreds of variants associated with age at menarche and support a role for puberty timing in cancer risk. *Nat Genet*. 2017 Jun;49(6):834-41.
6. Wray S, Grant P, Gainer H. Evidence that cells expressing luteinizing hormone-releasing hormone mRNA in the mouse are derived from progenitor cells in the olfactory placode. *Proc Natl Acad Sci U S A*. 1989 Oct;86(20):8132-6.
7. Chung WC, Moyle S, Tsai, Pei-San. Fibroblast Growth Factor 8 Signaling through Fibroblast Growth Factor Receptor 1 Is Required for the Emergence of Gonadotropin-Releasing Hormone Neurons. *Endocrinology*. 2008;149(10):4997-5003.
8. Kramer PR, Guerrero G, Krishnamurthy R, Mitchell PJ, Wray S. Ectopic expression of luteinizing hormone-releasing hormone and peripherin in the respiratory epithelium of mice lacking transcription factor AP-2alpha. *Mech Dev*. 2000 Jun;94(1-2):79-94.
9. Witchel SF, White C, Libman I. Association of the -243 A->G polymorphism of the glutamate decarboxylase 2 gene with obesity in girls with premature pubarche. *Fertil Steril*. 2009 May;91(5):1869-76.
10. Kokay IC, Petersen SL, Grattan DR. Identification of prolactin-sensitive GABA and kisspeptin neurons in regions of the rat hypothalamus involved in the control of fertility. *Endocrinology*. 2011 Feb;152(2):526-35.
11. Nishimura I, Ui-Tei K, Saigo K, Ishii H, Sakuma Y, Kato M. 17beta-estradiol at physiological concentrations augments Ca(2+) -activated K+ currents via estrogen receptor beta in the gonadotropin-releasing hormone neuronal cell line GT1-7. *Endocrinology*. 2008 Feb;149(2):774-82.
12. Burger LL, Vanacker C, Phumsatitpong C, Wagenmaker ER, Wang L, Olson DP, et al. Identification of Genes Enriched in GnRH Neurons by Translating Ribosome Affinity Purification and RNAseq in Mice. *Endocrinology*. 2018 Apr 1;159(4):1922-40.
13. Aguillon R, Batut J, Subramanian A, Madelaine R, Dufourcq P, Schilling TF, et al. Cell-type heterogeneity in the early zebrafish olfactory epithelium is generated from progenitors within preplacodal ectoderm. *Elife*. 2018 Jan 2;7:10.7554/eLife.32041.
14. Pinilla L, Pineda R, Gaytan F, Romero M, Garcia-Galiano D, Sanchez-Garrido MA, et al. Characterization of the reproductive effects of the anorexigenic VGF-derived peptide TLQP-21: in vivo and in vitro studies in male rats. *Am J Physiol Endocrinol Metab*. 2011 May;300(5):E837-47.
15. Yang C, Ye J, Liu Y, Ding J, Liu H, Gao X, et al. Methylation pattern variation between goats and rats during the onset of puberty. *Reprod Domest Anim*. 2018 Jun;53(3):793-800.
16. Quaynor SD, Bosley ME, Duckworth CG, Porter KR, Kim SH, Kim HG, et al. Targeted next generation sequencing approach identifies eighteen new candidate genes in normosmic hypogonadotropic hypogonadism and Kallmann syndrome. *Mol Cell Endocrinol*. 2016 Dec 5;437:86-96.
17. Kim JH, Seo GH, Kim GH, Huh J, Hwang IT, Jang JH, et al. Targeted Gene Panel Sequencing for Molecular Diagnosis of Kallmann Syndrome and Normosmic Idiopathic Hypogonadotropic Hypogonadism. *Exp Clin Endocrinol Diabetes*. 2018 Sep 14.
18. Passemard S, Titomanlio L, Elmaleh M, Afenjar A, Alessandri JL, Andria G, et al. Expanding the clinical and neuroradiologic phenotype of primary microcephaly due to ASPM mutations. *Neurology*. 2009 Sep 22;73(12):962-9.
19. Salian-Mehta S, Xu M, Knox AJ, Plummer L, Slavov D, Taylor M, et al. Functional consequences of AXL sequence variants in hypogonadotropic hypogonadism. *J Clin Endocrinol Metab*. 2014 Apr;99(4):1452-60.



20. Salian-Mehta S, Xu M, Wierman ME. AXL and MET crosstalk to promote gonadotropin releasing hormone (GnRH) neuronal cell migration and survival. *Mol Cell Endocrinol*. 2013 Jul 15;374(1-2):92-100.
21. Zhu H, Shah S, Shyh-Chang N, Shinoda G, Einhorn WS, Viswanathan SR, et al. Lin28a transgenic mice manifest size and puberty phenotypes identified in human genetic association studies. *Nat Genet*. 2010 Jul;42(7):626-30.
22. Jayakody SA, Andoniadou CL, Gaston-Massuet C, Signore M, Cariboni A, Bouloux PM, et al. SOX2 regulates the hypothalamic-pituitary axis at multiple levels. *J Clin Invest*. 2012 Oct;122(10):3635-46.
23. Provenzano C, Pascucci B, Lupari E, Civitareale D. Large scale analysis of transcription factor TTF-1/NKX2.1 target genes in GnRH secreting cell line GT1-7. *Mol Cell Endocrinol*. 2010 Jul 29;323(2):215-23.
